# Supplementary material for: Human Peripheral Blood Gamma Delta T Cells: Report on a Series of Healthy Caucasian Portuguese Adults and Comprehensive Review of the Literature
Source: PubMed Central journal article supplement (PMC7140678; doi:10.3390/cells9030729), 2020-03-16
Supplement: cells-09-00729-s001.pdf [file cells-09-00729-s001.pdf]

# **Title: Human Peripheral Blood Gamma Delta T Cells: Report on a Series of Healthy Caucasian Portuguese Adults and Comprehensive Review of the Literature**

## **SUPPLEMENTARY MATERIAL**

**Table S1:** Evaluation of the Normality of distributions using the D'Agostino-Pearson and Kolmogorov-Smirnov tests and identification of outliers using the Tukey test.

**Table S2.** Percentages of CD5, CD8, CD16, CD56, and CD28+ cells among peripheral blood  $\gamma\delta$  Tc, V $\delta$ 1+ and V $\delta$ 2+  $\gamma\delta$  Tc in the study population of healthy adults.

**Table S3.** Percentages and numbers of peripheral blood  $\gamma\delta$  Tc and  $\gamma\delta$  Tc subsets accordingly to the age in the study population of healthy adults.

**Table S4.** Percentages and numbers of peripheral blood  $\gamma\delta$  Tc and  $\gamma\delta$  Tc subsets accordingly to the gender in the study population of healthy adults.

**Table S5:** Spearman's rank correlations between the percentages and numbers of peripheral blood  $\gamma\delta$  Tc and  $\gamma\delta$  Tc subsets in the study population of healthy adults, and the age, by gender.

**Table S6:** Linear regression analysis between the percentages and numbers of peripheral blood  $\gamma\delta$  Tc and  $\gamma\delta$  Tc in the study population of healthy adults, and the age, by gender.

**Table S7.** Percentages and numbers of peripheral blood  $\gamma\delta$  Tc and  $\gamma\delta$  Tc subsets in the study population of healthy adults, accordingly to the age, by gender.

**Table S8.** 95th reference intervals for the percentages and numbers of peripheral blood  $\gamma\delta$  Tc and  $\gamma\delta$  Tc subsets in the study population of healthy adults obtained with different statistic approaches.

**Figure S1:** Relation between the logarithm of the percentages and numbers of peripheral blood  $\gamma\delta$  Tc and  $\gamma\delta$  Tc subsets in the study population of healthy adults, and the age, by gender. Panel A: males + females; panel B: females; panel C: males. The Spearman's rank correlation coefficients (R) and p values (P) are indicated inside the graphics.

**Table S1. Evaluation of the Normality of distributions using the D'Agostino-Pearson and Kolmogorov-Smirnov tests and identification of outliers using the Tukey test.**

| Method<br>(equipment) | Parameter                             | Tests for Normal distribution |                  |           | Out |
|-----------------------|---------------------------------------|-------------------------------|------------------|-----------|-----|
|                       |                                       | D'A-PT (P)                    | KST (P)          | ND        | TT  |
| Blood cell counts     | Hemoglobin (g/dl)                     | 0.556                         | >0.100           | Yes       | 0   |
|                       | Platelets (x 10 <sup>9</sup> /L)      | 0.499                         | 0.068            | Yes       | 0   |
|                       | WBC (cells/ $\mu$ l)                  | 0.386                         | >0.100           | Yes       | 0   |
|                       | Neutrophils (% WBC)                   | 0.570                         | >0.100           | Yes       | 0   |
|                       | Neutrophils (cells/ $\mu$ l)          | 0.179                         | >0.100           | Yes       | 0   |
|                       | Lymphocytes (% WBC)                   | 0.735                         | >0.100           | Yes       | 0   |
|                       | Lymphocytes (cells/ $\mu$ l)          | 0.243                         | >0.100           | Yes       | 1   |
| T cell populations    | Tc (% Lymphocytes)                    | 0.807                         | >0.100           | Yes       | 0   |
|                       | $\gamma\delta$ Tc (% Tc)              | <b>0.002</b>                  | 0.070            | <b>No</b> | 2   |
|                       | V $\delta$ 1 Tc (% $\gamma\delta$ Tc) | 0.192                         | >0.100           | Yes       | 0   |
|                       | V $\delta$ 2 Tc (% $\gamma\delta$ Tc) | 0.272                         | >0.100           | Yes       | 0   |
|                       | V $\gamma$ 9 Tc (% $\gamma\delta$ Tc) | 0.335                         | >0.100           | Yes       | 0   |
|                       | V $\delta$ 2/V $\delta$ 1 ratio       | <b>&lt;0.001</b>              | <b>&lt;0.001</b> | <b>No</b> | 2   |
| T cell counts         | Tc (cells/ $\mu$ l)                   | 0.05                          | >0.100           | Yes       | 1   |
|                       | $\gamma\delta$ Tc (cells/ $\mu$ l)    | <b>0.004</b>                  | <b>0.002</b>     | <b>No</b> | 1   |
|                       | V $\delta$ 1 Tc (cells/ $\mu$ l)      | <b>&lt;0.001</b>              | <b>&lt;0.001</b> | <b>No</b> | 4   |
|                       | V $\delta$ 2 Tc (cells/ $\mu$ l)      | <b>&lt;0.001</b>              | <b>0.001</b>     | <b>No</b> | 2   |
|                       | V $\gamma$ 9 Tc (cells/ $\mu$ l)      | <b>&lt;0.001</b>              | <b>0.002</b>     | <b>No</b> | 0   |

Peripheral blood samples from 30 healthy Caucasian European Portuguese adult individuals (blood donors), 18 males and 12 females, with median age of 47 years, ranging from 26 to 66 years (mean  $\pm$  standard deviation of 48  $\pm$  14 years).

Abbreviations: ND, Normal distribution; Out, number of outliers; Tc, T cells; WBC, white blood cells.

D'A-PT: D'Agostino-Pearson test (P value for Normal distribution); KST: Kolmogorov-Smirnov test (P value for Normal distribution); TT: Tukey test.

**Table S2. Percentages of CD5, CD8, CD16, CD56, and CD28+ cells among peripheral blood  $\gamma\delta$  Tc, V $\delta$ 1+ and V $\delta$ 2+  $\gamma\delta$  Tc in the study population of healthy adults.**

| Parameter          | $\gamma\delta$ Tc                     | V $\delta$ 1 Tc                       | V $\delta$ 2 Tc                       | V $\delta$ 1 vs. V $\delta$ 2 Tc<br>P (MWUT) |
|--------------------|---------------------------------------|---------------------------------------|---------------------------------------|----------------------------------------------|
| % CD5+ cells       | 93.2 (57.1 – 98.9)<br>88.2 $\pm$ 11.7 | 83.8 (20.5 – 99.0)<br>77.2 $\pm$ 22.9 | 98.7 (84.4 – 99.9)<br>96.8 $\pm$ 4.3  | <b>&lt;0.001</b>                             |
| % CD8+ cells       | 28.6 (11.5 – 66.9)<br>31.6 $\pm$ 13.0 | 44.9 (10.9 – 89.9)<br>46.5 $\pm$ 21.7 | 17.2 (9.4 – 41.4)<br>20.3 $\pm$ 9.1   | <b>&lt;0.001</b>                             |
| % CD16+ cells      | 22.3 (6.4 – 72.8)<br>27.5 $\pm$ 18.0  | 12.6 (0.1 – 73.5)<br>18.5 $\pm$ 17.5  | 15.0 (3.4 – 84.7)<br>27.1 $\pm$ 23.9  | 0.214                                        |
| % CD56+ cells      | 39.9 (12.0 – 71.1)<br>40.2 $\pm$ 15.7 | 34.8 (3.3 – 79.5)<br>35.6 $\pm$ 21.6  | 46.0 (13.5 – 74.7)<br>43.8 $\pm$ 17.6 | 0.104                                        |
| % CD16/CD56+ cells | 45.3 (12.3 – 77.3)<br>46.8 $\pm$ 18.2 | 45.9 (10.8 – 87.0)<br>44.0 $\pm$ 22.2 | 52.5 (18.2 – 91.1)<br>51.7 $\pm$ 19.7 | 0.156                                        |
| % CD28+ cells      | 41.6 (9.0 – 80.6)<br>45.5 $\pm$ 21.5  | 17.5 (4.4 – 73.0)<br>23.4 $\pm$ 18.7  | 66.4 (2.7 – 94.0)<br>59.3 $\pm$ 25.4  | <b>&lt;0.001</b>                             |

Abbreviations: MWUT: Mann-Whitney U test; P, p value; Tc, T cells. Results are presented as median, (minimum – maximum) values, and mean  $\pm$  SD.

**Table S3. Percentages and numbers of peripheral blood  $\gamma\delta$  Tc and  $\gamma\delta$  Tc subsets accordingly to the age in the study population of healthy adults.**

|                                                                  | 20 to 45 years (n=13)                 | 46 to 70 years (n=17)                 | P (MWUT)     |
|------------------------------------------------------------------|---------------------------------------|---------------------------------------|--------------|
| <b>Gender</b>                                                    |                                       |                                       |              |
| Males: females (ratio)                                           | 8:5 (1.6)                             | 10:7 (1.4)                            | <b>NA</b>    |
| <b><math>\gamma\delta</math> Tc (% Tc)</b>                       | 5.7 (1.9 - 13.6)<br>6.5 $\pm$ 3.3     | 3.0 (1.2 - 15.4)<br>3.8 $\pm$ 3.3     | <b>0.010</b> |
| <b>V<math>\delta</math>1 Tc (% <math>\gamma\delta</math> Tc)</b> | 24.2 (3.5 - 58.1)<br>27.5 $\pm$ 16.6  | 29.6 (6.2 - 65.7)<br>27.2 $\pm$ 16.1  | 0.984        |
| <b>V<math>\delta</math>2 Tc (% <math>\gamma\delta</math> Tc)</b> | 68.4 (15.7 - 96.0)<br>62.7 $\pm$ 22.2 | 60.0 (19.6 - 93.4)<br>57.9 $\pm$ 23.2 | 0.477        |
| <b>V<math>\gamma</math>9 Tc (% <math>\gamma\delta</math> Tc)</b> | 72.9 (27.9 - 96.5)<br>70.8 $\pm$ 18.3 | 61.7 (25.7 - 95.1)<br>62.8 $\pm$ 21.9 | 0.267        |
| <b>V<math>\delta</math>2/V<math>\delta</math>1 ratio</b>         | 2.7 (0.3 - 27.7)<br>4.8 $\pm$ 7.2     | 2.0 (0.5 - 15.1)<br>3.7 $\pm$ 3.7     | 0.818        |
| <b><math>\gamma\delta</math> Tc (cells/<math>\mu</math>l)</b>    | 76 (39 - 217)<br>102 $\pm$ 55         | 45 (9 - 253)<br>60 $\pm$ 59           | <b>0.014</b> |
| <b>V<math>\delta</math>1 Tc (cells/<math>\mu</math>l)</b>        | 17 (8 - 75)<br>32 $\pm$ 25            | 15 (2 - 35)<br>15 $\pm$ 10            | 0.065        |
| <b>V<math>\delta</math>2 Tc (cells/<math>\mu</math>l)</b>        | 56 (17 - 220)<br>80 $\pm$ 60          | 19 (6 - 243)<br>49 $\pm$ 62           | <b>0.035</b> |
| <b>V<math>\gamma</math>9 Tc (cells/<math>\mu</math>l)</b>        | 73 (30 - 221)<br>90 $\pm$ 58          | 26 (7 - 247)<br>52 $\pm$ 62           | <b>0.008</b> |

Abbreviations: MWUT: Mann-Whitney U test; NA, not applicable; P, p value; Tc, T cells. Results are presented as median, (minimum – maximum) values, and mean  $\pm$  standard deviation.

**Table S4. Percentages and numbers of peripheral blood  $\gamma\delta$  Tc and  $\gamma\delta$  Tc subsets accordingly to the gender in the study population of healthy adults.**

| T cell population                     | Males (n=18)                                     | Females (n=12)                                   | P (MWUT) | P (FT)           |
|---------------------------------------|--------------------------------------------------|--------------------------------------------------|----------|------------------|
| Age (years)                           | 46 (26 - 68)<br>47 $\pm$ 13                      | 52 (22 - 66)<br>49 $\pm$ 15                      | NA       | NA               |
| $\gamma\delta$ Tc (% Tc)              | 2.9 (1.2 - 15.4)<br>5.1 $\pm$ 4.5<br>[20.2]      | 4.6 (2.2 - 7.9)<br>4.8 $\pm$ 1.4<br>[2.0]        | 0.352    | <b>&lt;0.001</b> |
| V $\delta$ 1 Tc (% $\gamma\delta$ Tc) | 27.4 (3.5 - 65.7)<br>29.5 $\pm$ 17.5<br>[305.7]  | 21.0 (11.9 - 58.1)<br>24.1 $\pm$ 13.9<br>[194.6] | 0.397    | 0.450            |
| V $\delta$ 2 Tc (% $\gamma\delta$ Tc) | 57.7 (23.2 - 96.0)<br>58.4 $\pm$ 21.6<br>[466.4] | 72.0 (15.7 - 84.4)<br>62.4 $\pm$ 24.7<br>[607.9] | 0.395    | 0.604            |
| V $\gamma$ 9 Tc (% $\gamma\delta$ Tc) | 69.1 (26.6 - 96.5)<br>67.1 $\pm$ 18.3<br>[334.2] | 72.4 (25.7 - 93.8)<br>65.1 $\pm$ 24.2<br>[586.8] | 0.966    | 0.288            |
| V $\delta$ 2/V $\delta$ 1 ratio       | 2.0 (0.5 - 27.7)<br>4.5 $\pm$ 6.8<br>[46.0]      | 3.5 (0.3 - 7.0)<br>3.6 $\pm$ 2.3<br>[5.3]        | 0.446    | <b>0.001</b>     |
| $\gamma\delta$ Tc (cells/ $\mu$ l)    | 49 (9 - 253)<br>79 $\pm$ 75<br>[5658]            | 74 (42 - 134)<br>78 $\pm$ 29<br>[837]            | 0.220    | <b>0.003</b>     |
| V $\delta$ 1 Tc (cells/ $\mu$ l)      | 15 (1 - 75)<br>23 $\pm$ 23<br>[513]              | 16 (6 - 61)<br>22 $\pm$ 14<br>[203]              | 0.602    | 0.122            |
| V $\delta$ 2 Tc (cells/ $\mu$ l)      | 31 (6 - 24)<br>63 $\pm$ 75<br>[5557]             | 55 (16 - 124)<br>61 $\pm$ 39<br>[1487]           | 0.391    | <b>0.031</b>     |
| V $\gamma$ 9 Tc (cells/ $\mu$ l)      | 38 (7 - 247)<br>71 $\pm$ 75<br>[5606]            | 57 (16 - 123)<br>64 $\pm$ 39<br>[1542]           | 0.573    | <b>0.034</b>     |

Abbreviations: FT: F test, for equal variances; MWUT: Mann-Whitney U test NA, not applicable; P, p value; Tc, T cells. Results are presented as median, (minimum – maximum), mean  $\pm$  SD and [variance].

**Table S5. Spearman's rank correlations between the percentages-and numbers of peripheral blood  $\gamma\delta$  Tc and  $\gamma\delta$  Tc subsets in the study population of healthy adults, and the age, by gender.**

| <b>T cell population</b>              | <b>Study population<br/>(n=30)</b> | <b>Females<br/>(n=12)</b> | <b>Males<br/>(n=18)</b>        |
|---------------------------------------|------------------------------------|---------------------------|--------------------------------|
| $\gamma\delta$ Tc (% Tc)              | r = -0.396<br><b>p = 0.031</b>     | r = -0.389<br>p = 0.212   | r = -0.476<br><b>p = 0.046</b> |
| V $\delta$ 1 Tc (% $\gamma\delta$ Tc) | r = -0.143<br>p = 0.450            | r = -0.389<br>p = 0.212   | r = 0.024<br>p = 0.925         |
| V $\delta$ 2 Tc (% $\gamma\delta$ Tc) | r = 0.021<br>p = 0.912             | r = 0.224<br>p = 0.484    | r = -0.036<br>p = 0.888        |
| V $\gamma$ 9 Tc (% $\gamma\delta$ Tc) | r = 0.0142<br>p = 0.940            | r = 0.095<br>p = 0.770    | r = 0.061<br>p = 0.810         |
| V $\delta$ 2 / V $\delta$ 1 ratio     | r = 0.106<br>p = 0.576             | r = 0.378<br>p = 0.225    | r = -0.046<br>p = 0.857        |
| $\gamma\delta$ Tc (cells/ $\mu$ l)    | r = -0.392<br><b>p = 0.032</b>     | r = -0.053<br>p = 0.871   | r = -0.613<br><b>p = 0.007</b> |
| V $\delta$ 1 Tc (cells/ $\mu$ l)      | r = -0.419<br><b>p = 0.021</b>     | r = -0.329<br>p = 0.296   | r = -0.558<br><b>p = 0.016</b> |
| V $\delta$ 2 Tc (cells/ $\mu$ l)      | r = -0.276<br>p = 0.139            | r = 0.165<br>p = 0.609    | r = -0.577<br><b>p = 0.012</b> |
| V $\gamma$ 9 Tc (cells/ $\mu$ l)      | r = -0.337<br>p = 0.069            | r = 0.025<br>p = 0.940    | r = -0.549<br><b>p = 0.018</b> |

Abbreviations: Tc, T cells.

The results are presented as Spearman's rank correlation coefficients (r) and p values.

**Table S6. Linear regression analysis between the percentages and numbers of peripheral blood  $\gamma\delta$  Tc and  $\gamma\delta$  Tc subsets in the study population of healthy adults, and the age, by gender.**

| T cell population                     | Study population<br>(n=30)                         | Females<br>(n=12)                                        | Males<br>(n=18)                                   |
|---------------------------------------|----------------------------------------------------|----------------------------------------------------------|---------------------------------------------------|
| $\gamma\delta$ Tc<br>(% Tc)           | $R^2 = 0.08590$<br>$y = 8,5843 + -0,07582 x$       | $R^2 = 0.1259$<br>$y = 6,3772 + -0,03309 x$              | $R^2 = 0.1074$<br>$y = 10,4174 + -0,1130 x$       |
| Logarithmic<br>Transformation         | $R^2 = 0.1413$<br>$\log(y) = 0,9915 + -0,008300 x$ | $R^2 = 0.04990$<br>$\log(y) = 0,7580 + -0,002028 x$      | $R^2 = 0.2502$<br>$\log(y) = 1,2285 + -0,01436 x$ |
| $\gamma\delta$ Tc<br>(cells/ $\mu$ l) | $R^2 = 0.07185$<br>$y = 134,1839 + -1,1748 x$      | $R^2 = 0.02808$<br>$y = 93,1334 + -0,3168 x$             | $R^2 = 0.1135$<br>$y = 169,8364 + -1,9431 x$      |
| Logarithmic<br>Transformation         | $R^2 = 0.1715$<br>$\log(y) = 2,2869 + -0,01102 x$  | $R^2 = 0.02899$<br>$\log(y) = 1,9496 + -0,001759 x$      | $R^2 = 0.3403$<br>$\log(y) = 2,6344 + -0,02003 x$ |
| V $\delta$ 1 Tc<br>(cells/ $\mu$ l)   | $R^2 = 0.1884$<br>$y = 51.6875 + -0.6134 x$        | $R^2 = 0.06641$<br>$y = 33.3499 + -0.2400 x$             | $R^2 = 0.2961$<br>$y = 67.3707 + -0.9447 x$       |
| Logarithmic<br>Transformation         | $R^2 = 0.2209$<br>$\log(y) = 1,8224 + -0,01291 x$  | $R^2 = 0.1065$<br>$\log(y) = 1,5203 + -0,005136 x$       | $R^2 = 0.3493$<br>$\log(y) = 2,1207 + -0,02034 x$ |
| V $\delta$ 2 Tc<br>(cells/ $\mu$ l)   | $R^2 = 0.01409$<br>$y = 87.9312 + -0.5334 x$       | $R^2 = 0.01301$<br>$y = 47.3104 + 0.2874 x$              | $R^2 = 0.04856$<br>$y = 122.5156 + -1.2595 x$     |
| Logarithmic<br>Transformation         | $R^2 = 0.09648$<br>$\log(y) = 2,0729 + -0,01010 x$ | $R^2 = 0.004351$<br>$\log(y) = 1,6211 + 0,001401 x$      | $R^2 = 0.2879$<br>$\log(y) = 2,5161 + -0,02107 x$ |
| V $\gamma$ 9 Tc<br>(cells/ $\mu$ l)   | $R^2 = 0.02805$<br>$y = 104,2179 + -0,7585 x$      | $R^2 = 0.003336$<br>$y = 57,1226 + 0,1482 x$             | $R^2 = 0.07250$<br>$y = 143,2065 + -1,5457 x$     |
| Logarithmic<br>Transformation         | $R^2 = 0.1188$<br>$\log(y) = 2,1632 + -0,01080 x$  | $R^2 = 0.000002884$<br>$\log(y) = 1.7209 + 0,00003312 x$ | $R^2 = 0.2967$<br>$\log(y) = 2,5864 + -0,02100 x$ |

Abbreviations: Tc, T cells.

Linear regression analysis: coefficients of determination ( $R^2$ ) and regression equations:  $y = a + bx$  and  $\log(y) = a + bx$ , where "y" represents the immunological parameter, "x" represents age, "a" represents the intercept, and "b" represents the slope.

**Table S7. Percentages and numbers of peripheral blood  $\gamma\delta$  Tc and  $\gamma\delta$  Tc subsets in the study population of healthy adults, accordingly to the age, by gender.**

| T cells                                                             | 20 to 40 years (n=13)                               |                                                     |          |              | 46 to 70 years (n=17)                               |                                                     |              |              |
|---------------------------------------------------------------------|-----------------------------------------------------|-----------------------------------------------------|----------|--------------|-----------------------------------------------------|-----------------------------------------------------|--------------|--------------|
|                                                                     | Males (n=8)                                         | Females (n=5)                                       | P (MWUT) | P (FT)       | Males (n=10)                                        | Females (n=7)                                       | P (MWUT)     | P (FT)       |
| <b>Total <math>\gamma\delta</math> Tc (% Tc)</b>                    | 7.9<br>(1.9 - 13.6)<br>7.4 $\pm$ 3.8<br>[14.7]      | 5.5<br>(2.2 - 7.9)<br>5.2 $\pm$ 2.0<br>[4.1]        | 0.222    | 0.236        | 2.1<br>(1.2 - 15.4)<br>3.3 $\pm$ 4.3<br>[18.6]      | 4.3<br>(3.4 - 6.1)<br>4.5 $\pm$ 0.8<br>[0.7]        | <b>0.006</b> | <b>0.001</b> |
| <b>V<math>\delta</math>1 Tc (% <math>\gamma\delta</math> Tc)</b>    | 24.6<br>(3.5 - 55.4)<br>25.2 $\pm$ 17.0<br>[287.9]  | 21.3<br>(20.7 - 58.1)<br>30.4 $\pm$ 16.0<br>[257.3] | 0.724    | 0.969        | 31.0<br>(6.2 - 65.9)<br>33.0 $\pm$ 18.0<br>[324.1]  | 13.0<br>(11.9 - 36.9)<br>19.6 $\pm$ 11.3<br>[128.5] | 0.118        | 0.273        |
| <b>V<math>\delta</math>2 Tc (% <math>\gamma\delta</math> Tc)</b>    | 66.4<br>(35.5 - 96.0)<br>63.1 $\pm$ 21.4<br>[458.4] | 74.2<br>(15.7 - 76.2)<br>62.1 $\pm$ 26.0<br>[677.2] | 0.622    | 0.611        | 54.8<br>(23.2 - 93.5)<br>54.6 $\pm$ 22.1<br>[489.3] | 69.7<br>(19.6 - 84.4)<br>62.6 $\pm$ 25.7<br>[662.8] | 0.329        | 0.504        |
| <b>V<math>\gamma</math>9 Tc (% <math>\gamma\delta</math> Tc)</b>    | 71.3<br>(46.0 - 96.5)<br>72.6 $\pm$ 16.0<br>[257.2] | 79.8<br>(27.9 - 84.3)<br>68.0 $\pm$ 23.2<br>[538.8] | 0.724    | 0.370        | 61.3<br>(26.6 - 95.1)<br>62.6 $\pm$ 19.5<br>[381.9] | 61.7<br>(25.7 - 93.8)<br>63.0 $\pm$ 26.5<br>[704.7] | 0.845        | 0.972        |
| <b>V<math>\delta</math>2/V<math>\delta</math>1 ratio</b>            | 2.7<br>(0.6 - 27.7)<br>6.1 $\pm$ 9.0<br>[81.3]      | 3.5<br>(0.3 - 3.6)<br>2.6 $\pm$ 1.4<br>[2.1]        | 0.770    | <b>0.003</b> | 1.6<br>(0.5 - 15.1)<br>3.2 $\pm$ 3.4<br>[19.5]      | 4.5<br>(0.6 - 7.0)<br>4.3 $\pm$ 2.6<br>[7.0]        | 0.172        | 0.222        |
| <b>Total <math>\gamma\delta</math> Tc (cells/<math>\mu</math>l)</b> | 114<br>(39 - 217)<br>116 $\pm$ 63<br>[3997]         | 72<br>(50 - 134)<br>80 $\pm$ 32<br>[993]            | 0.524    | 0.197        | 25<br>(9 - 253)<br>49 $\pm$ 73<br>[5372]            | 77<br>(42 - 124)<br>76 $\pm$ 29<br>[861]            | <b>0.019</b> | <b>0.037</b> |
| <b>V<math>\delta</math>1 Tc (cells/<math>\mu</math>l)</b>           | 17<br>(8 - 75)<br>35 $\pm$ 29<br>[813]              | 16<br>(15 - 61)<br>28 $\pm$ 20<br>[395]             | 0.943    | 0.507        | 11<br>(2 - 35)<br>14 $\pm$ 11<br>[129]              | 16<br>(6 - 29)<br>17 $\pm$ 7<br>[54]                | 0.435        | 0.512        |
| <b>V<math>\delta</math>2 Tc (cells/<math>\mu</math>l)</b>           | 70<br>(33 - 220)<br>95 $\pm$ 68<br>[4660]           | 54<br>(17 - 111)<br>55 $\pm$ 35<br>[1249]           | 0.354    | 0.221        | 18<br>(6 - 243)<br>38 $\pm$ 72<br>[5247]            | 65<br>(16 - 124)<br>66 $\pm$ 43<br>[1835]           | <b>0.064</b> | 0.214        |
| <b>V<math>\gamma</math>9 Tc (cells/<math>\mu</math>l)</b>           | 98<br>(38 - 221)<br>107 $\pm$ 64<br>[4054]          | 58<br>(30 - 123)<br>61 $\pm$ 37<br>[1379]           | 0.171    | 0.314        | 21<br>(7 - 247)<br>42 $\pm$ 73<br>[54]              | 57<br>(16 - 118)<br>66 $\pm$ 44<br>[1894]           | <b>0.064</b> | 0.221        |

Abbreviations: MWUT, Mann-Whitney U test; FT, F test (for equal variances); P, p value; Tc, T cells. Results are presented as median (minimum – maximum) values, mean  $\pm$  SD and [variance]



**Table S8. 95th reference intervals for the percentages and numbers of peripheral blood  $\gamma\delta$  Tc and  $\gamma\delta$  Tc subsets in the study population of healthy adults obtained with different statistic approaches.**

| T cell population                                                          | Parametric 97.5 <sup>th</sup> percentile method |                                 | Non-parametric percentile method |             | Percentile bootstrap method (“Robust Method”) |                                  |
|----------------------------------------------------------------------------|-------------------------------------------------|---------------------------------|----------------------------------|-------------|-----------------------------------------------|----------------------------------|
|                                                                            | LL                                              | UP                              | LL                               | UP          | LL                                            | UL                               |
| $\gamma\delta$ Tc (% Tc)<br>Yes (2) *                                      | -2.0<br>(-3.9 to -0.1)                          | <b>12.0</b><br>(10.1 to 13.8)   | 1.2                              | <b>15.4</b> | -3.4<br>(-5.6 to -0.9)                        | <b>11.6</b><br>(8.8 to 14.3)     |
| <b>V<math>\delta</math>1 Tc (% <math>\gamma\delta</math> Tc)</b><br>No (0) | -4.3<br>(-12,8 to 4,2)                          | <b>59.0</b><br>(50.5 to 67.5)   | 3.5                              | <b>65.7</b> | -8.6<br>(-18,0 to -0,9)                       | <b>59.5</b><br>(48.3 to 69.3)    |
| <b>V<math>\delta</math>2 Tc (% <math>\gamma\delta</math> Tc)</b><br>No (0) | 15.8<br>(3.9 to 27.7)                           | <b>104.0</b><br>(99.2 to 116.0) | 15.7                             | <b>96.0</b> | 12.3<br>(1.6 to 29.2)                         | <b>110.1</b><br>(99.4 to 119.2)  |
| <b>V<math>\gamma</math>9 Tc (% <math>\gamma\delta</math> Tc)</b><br>No (0) | 26.1<br>(15.4 to 36.9)                          | <b>106.4</b><br>(95.7 to 117.2) | 25.7                             | <b>96.5</b> | 26.7<br>(13.3 to 39.2)                        | <b>112.8</b><br>(102.2 to 120.6) |
| $\gamma\delta$ Tc (cells/ $\mu$ l)<br>Yes (1)                              | -40<br>(-71 to -8)                              | <b>197</b><br>(165 to 228)      | 9                                | <b>253</b>  | -67<br>(-101 to -25)                          | <b>189</b><br>(143 to 235)       |
| <b>V<math>\delta</math>1 Tc (cells/<math>\mu</math>l)</b><br>Yes (4)       | -16<br>(-26 to -5)                              | <b>61</b><br>(50 to 71)         | 1                                | <b>75</b>   | -27<br>(-38 to -11)                           | <b>57</b><br>(41 to 71)          |
| <b>V<math>\delta</math>2 Tc (cells/<math>\mu</math>l)</b><br>Yes (2)       | -59<br>(-91 to -26)                             | <b>184</b><br>(151 to 216)      | 6                                | <b>243</b>  | -98<br>(-135 to -45)                          | <b>176</b><br>(123 to 222)       |
| <b>V<math>\gamma</math>9 Tc (cells/<math>\mu</math>l)</b><br>No (0)        | -54<br>(-87 to -21)                             | <b>190</b><br>(157 to 223)      | 7                                | <b>247</b>  | -94<br>(-129 to -42)                          | <b>189</b><br>(133 to 231)       |

Abbreviations: Tc, T cells. \* Yes or No refers to presence or absence of suspected outliers, respectively (Tukey test). The number of outliers is indicated between brackets. Outliers were not excluded for analysis.

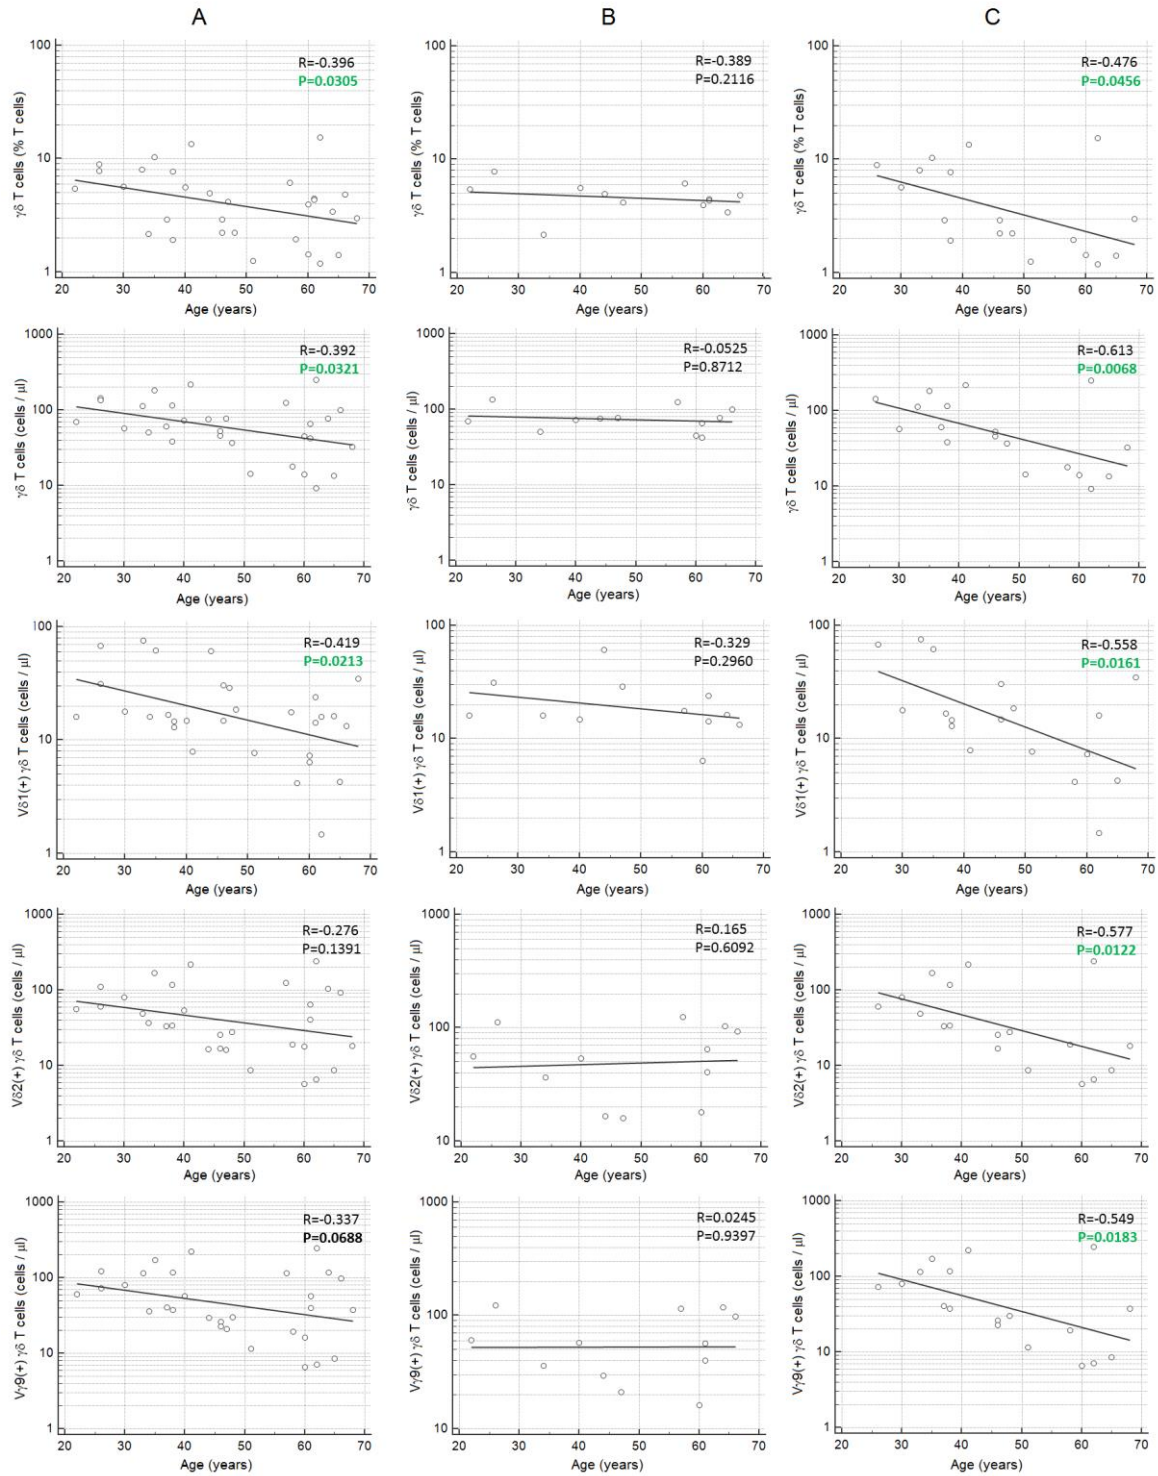

**Figure S1. Relation between the logarithm of the percentages and numbers of peripheral blood  $\gamma\delta$  T cells and  $\gamma\delta$  T cell subsets in the study population of healthy adults, and the age, by gender. Panel A: males + females; panel B: females; panel C: males. The Spearman's rank correlation coefficients (R) and p values (P) are indicated inside the graphics.**
